# Supplementary material
Source: Elsevier journal article supplement (https://www.sciencedirect.com/science/article/pii/S2173574318301357)
Supplement: mmc1 [file S2173574318301357:mmc1.docx]

1. [{(Anexo)}] Additional material

Additional material concerning this article is provided in the electronic version available at

<doi:10.1016/j.reuma.2017.06.007>.

1. [{(Anexo A)}] Supplemental material
